# Supplementary material
Source: PubMed Central journal article supplement (PMC6179149)
Supplement: NIHMS986179-supplement-1.pdf [file NIHMS986179-supplement-1.pdf]

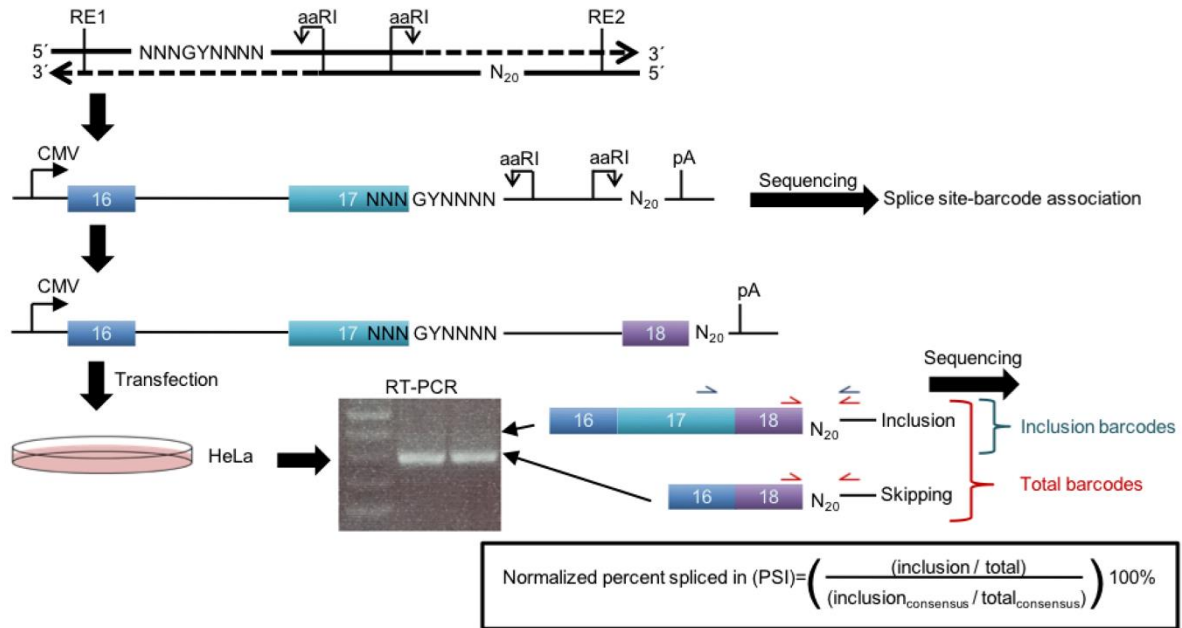

Figure S1. Detailed diagram of high-throughput method used to assess all 5'ss sequences. Related to Figure 2A. RE1 and RE2 represent restriction enzyme sites used to insert the minigenes into the pcDNA5 expression vector, which has a cytomegalovirus (CMV) promoter and a bGH polyadenylation site (pA).

**A**

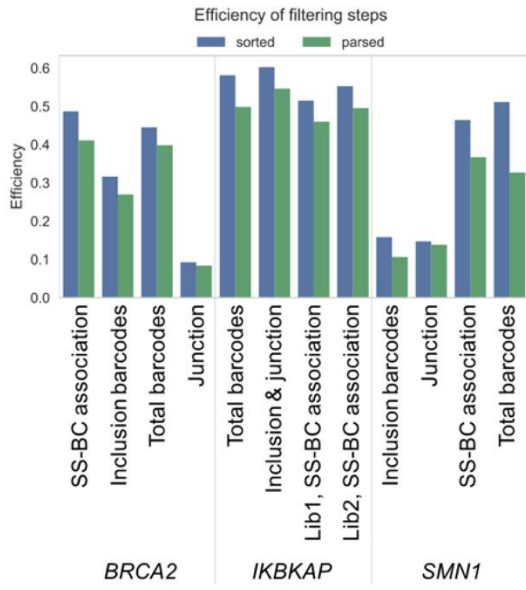

**B**

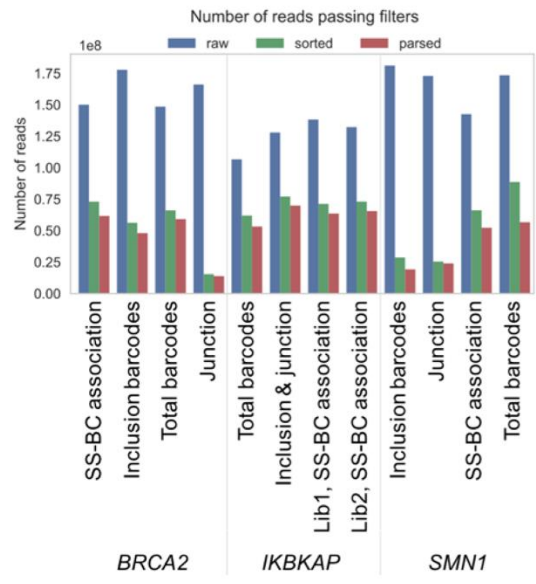

**C**

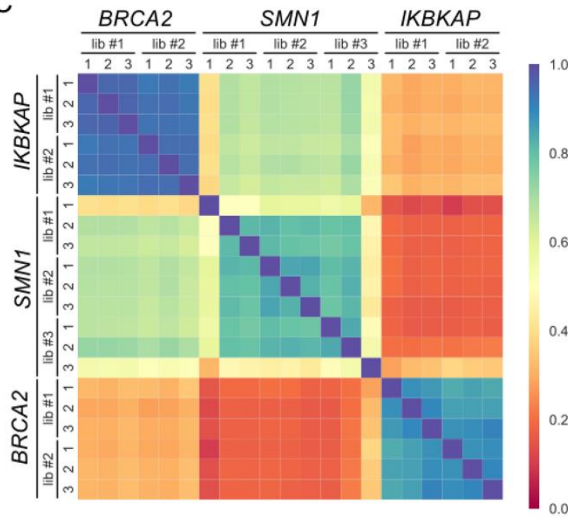

**D**

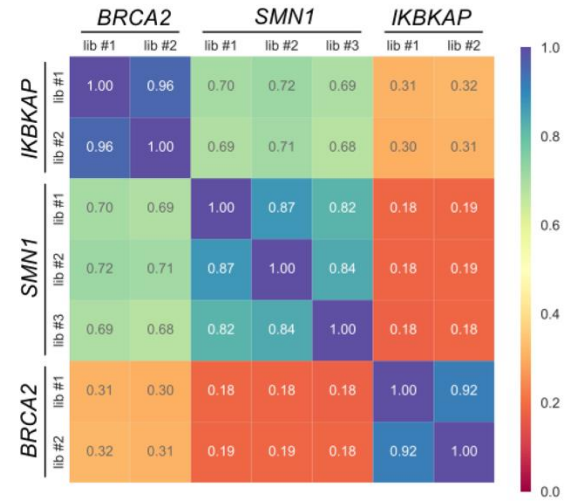

**E**

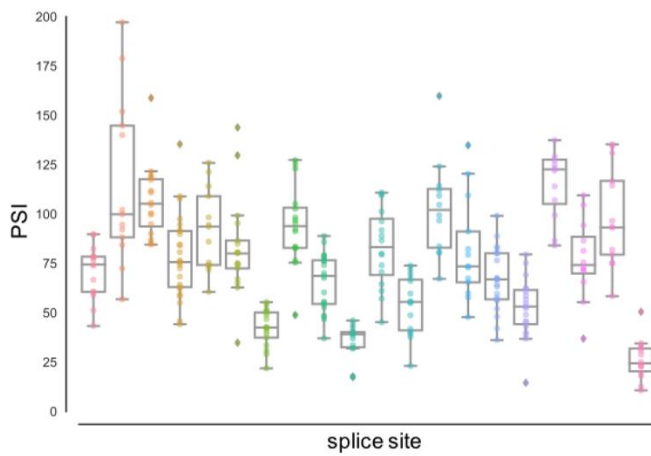

Figure S2. Parsing of raw high-throughput results and association matrix of the coefficient of determination comparing libraries. Related to Table and Figure 2D.

- (A) The efficiency of filtering of raw sequencing data through the bioinformatics pipeline.
- (B) Number of reads for analysis after filtering.
- (C) Two low-quality datasets (*SMN1* library 1, replicate 1, and *SMN1* library 3, replicate 3) were removed from subsequent analyses.
- (D) Coefficient of determination values show that the independently derived libraries highly correlate with each other within a context.
- (E) Box plot of the PSI of individual barcodes for 20 randomly selected 5'ss. For this analysis, each barcode is required to have at least 10 counts in the total RNA sample in order to accurately calculate a PSI. The median PSI of the 5'ss is required to be  $\geq 20$ . For each 5'ss, a minimum of 10 associated barcodes is necessary for the 5'ss to be included in the analysis. The central rectangle spans the first to the third quartile, with the median line segment. The vertical line presents the maximum and minimum.

A

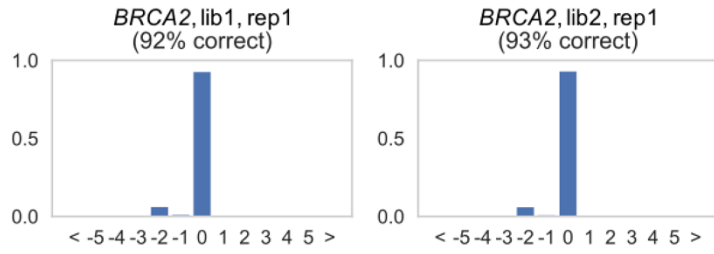

B

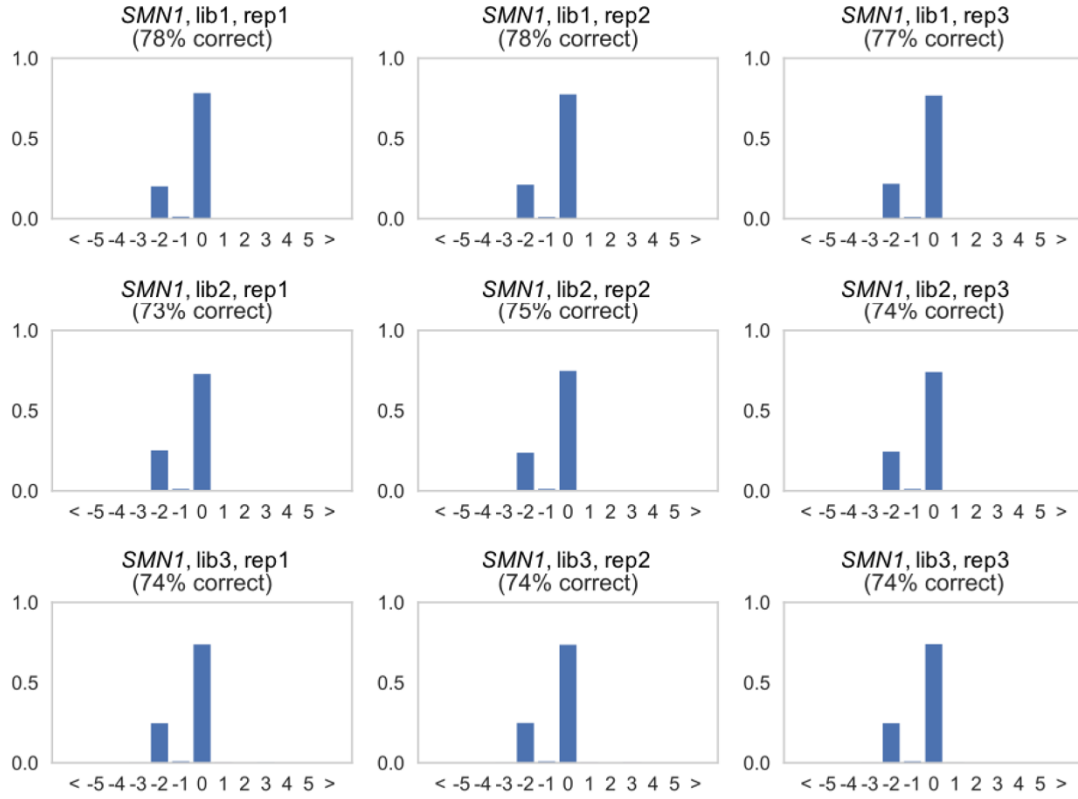

C

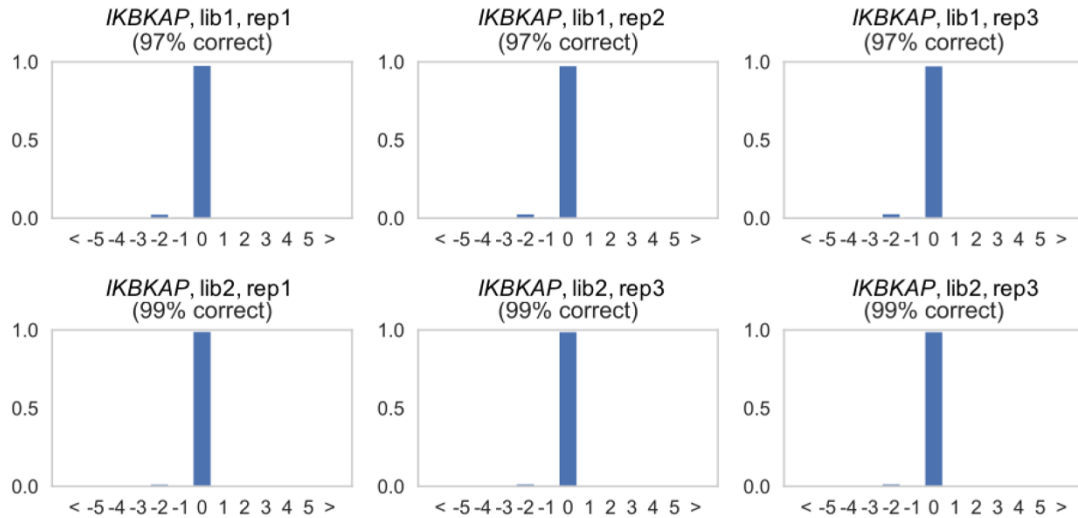

Figure S3. Exon-exon junction analysis of libraries. Related to Figure 2 and “high-throughput analysis of the activity of all 5’ss sequences”.

- (A) Sequencing results for the exon-exon junction reveal that a secondary GU at the -2 and -1 positions is preferentially used when the GU or GC at the +1 and +2 positions escapes recognition. 5’ss sequences with the secondary -2G-1U were removed from further analysis.
- (B) Same as A, but in *SMN1*.
- (C) Same as A, but in *IKBKAP*.

A

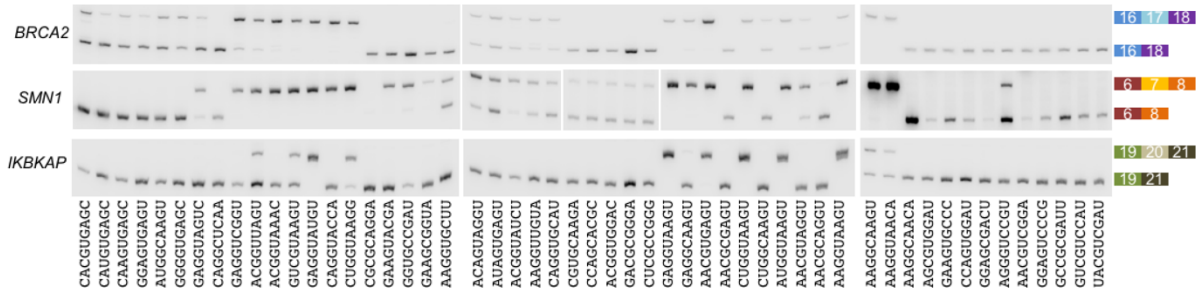

B

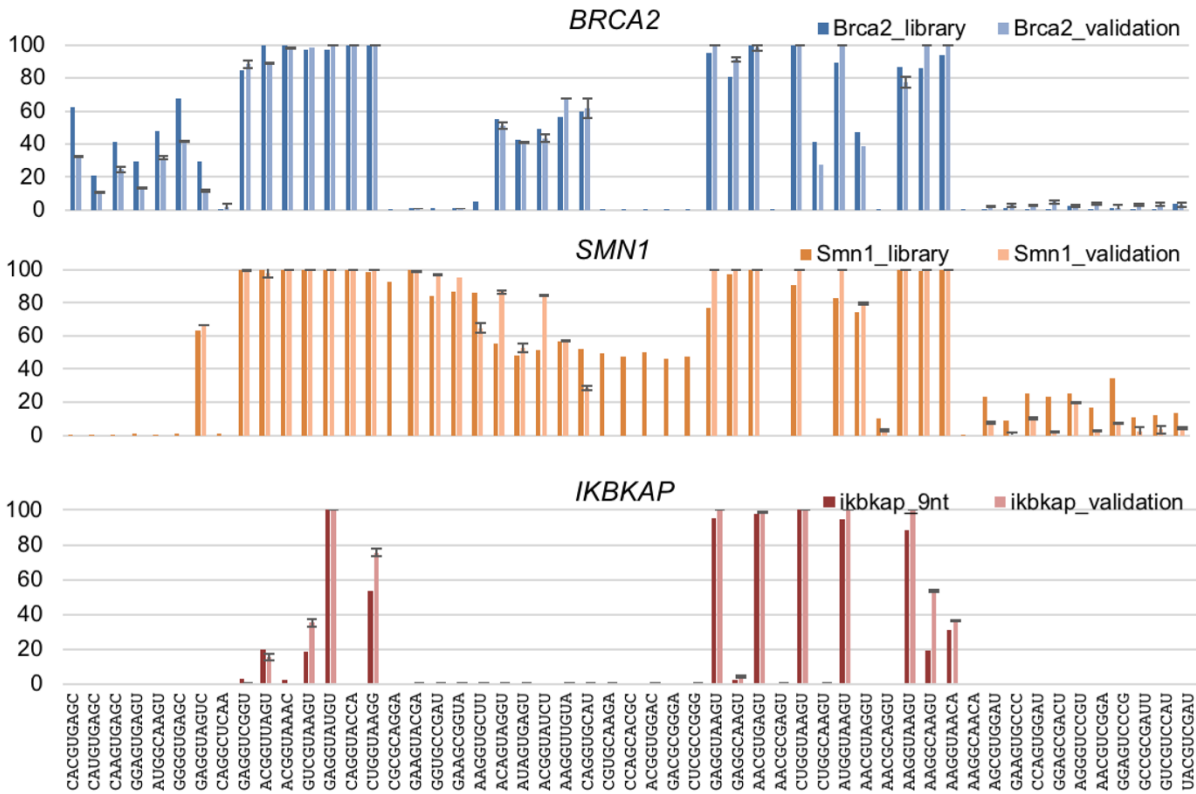

Figure S4. Manual validations of randomly-selected 5'ss in the three contexts. Related to Figure 2F.

- (A) Gel showing the splicing results of the same 53 randomly-selected 5'ss in the *BRCA2*, *SMN1*, and *IKBKAP* minigenes. Gel images are representatives of triplicates.
- (B) Graphs comparing the percent spliced in (PSI) of 5'ss derived from the library results and manual validations. Standard deviation is represented by error bars.

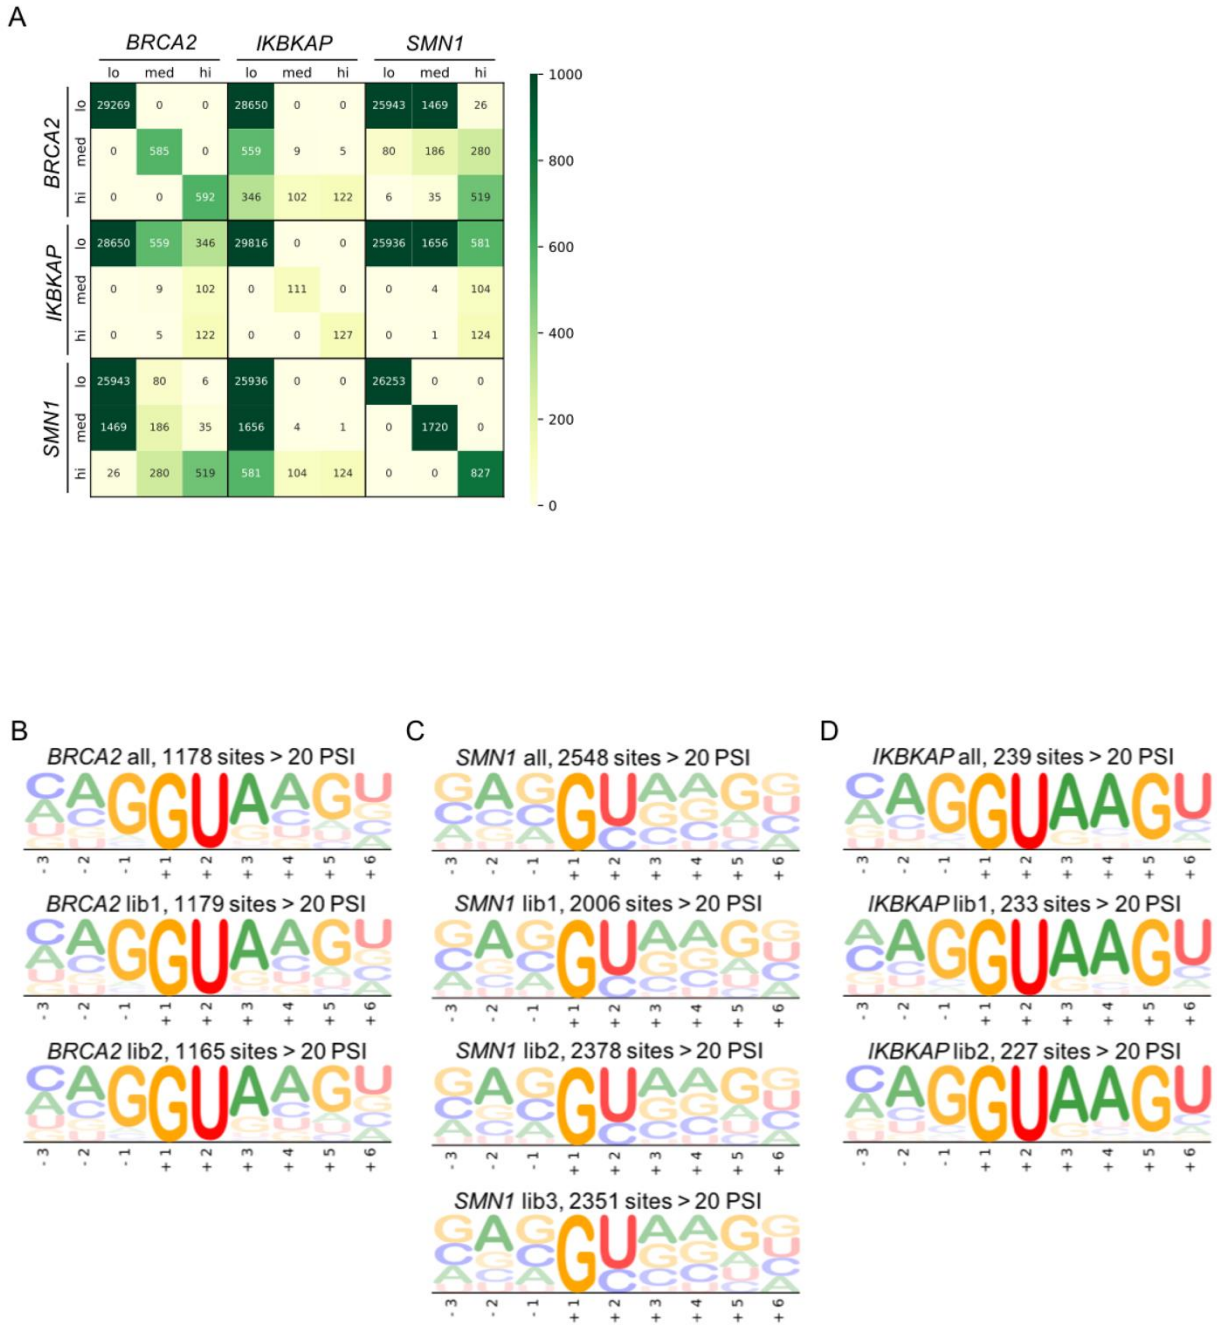

Figure S5. Sequence logo of 5'ss in each context. Related to Figure 3B and 3C.

- (A) Heat map illustrating the overlaps between 5'ss with lo (PSI < 20), med ( $20 \leq \text{PSI} < 80$ ) or hi ( $80 \leq \text{PSI}$ ) activity levels among the three gene contexts.
- (B) Sequence logo for all 5'ss compiled or separated by each independently-derived library in *BRCA2*.
- (C) Same as A, but in *SMN1*.
- (D) Same as A, but in *IKBKAP*.

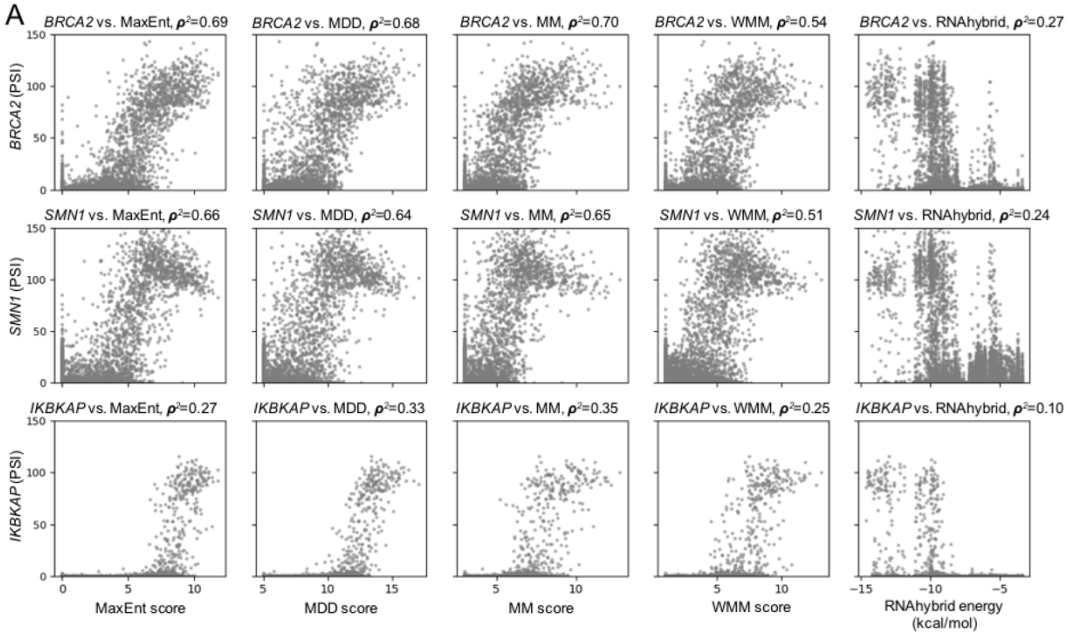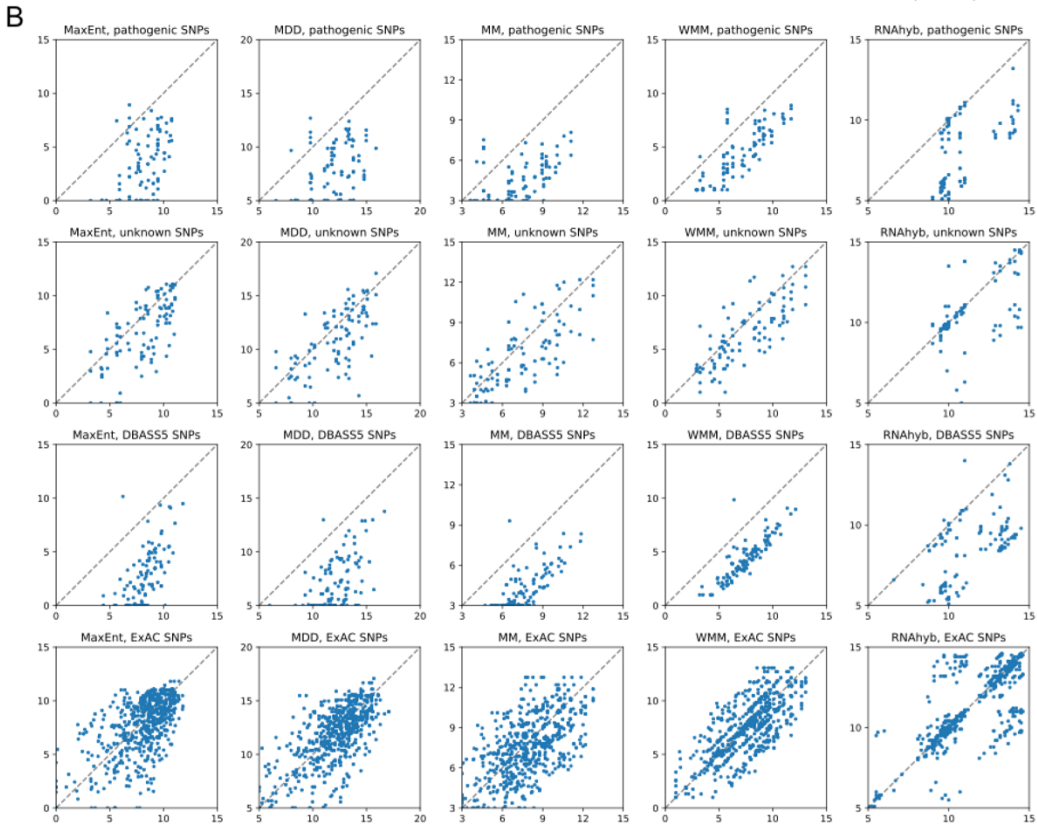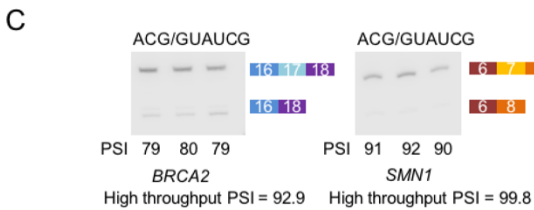



Figure S6. Comparison between library results and several conventional prediction algorithms. Related to Figure 3D, 3E, and 6.

- (A) Scatter plots comparing the predicted values for each 5'ss using maximum entropy (MaxENT; Yeo et al., 2004), maximum dependence decomposition (MDD; Burge et al., 1998), first-order Markov model (MM; Krogh et al., 1994), weight matrix model (WMM), and RNAhybrid (RNAhyb; Kruger et al., 2006) versus the experimentally derived library results.
- (B) Scatter plots, corresponding to the computational scoring matrices used above, comparing the predicted PSI of the WT 5'ss sequences to mutant 5'ss sequences known to be pathogenic in *BRCA1* and *BRCA2* (pathogenic SNPs), with unclassified or uncertain significance in *BRCA1* and *BRCA2* (unknown SNPs), 5'ss mutations across a broad range of genes and diseases (DBASS5), and for 5'ss SNPs with >10% frequency found in the human population (ExAC SNPs).
- (C) RT-PCR validation of the usage of the 5'ss with the sequence ACG/GUAUCG, which showed high inclusion ratio in *BRCA2* and *SMN1* library results but does not occur naturally as a 5'ss in the human transcriptome. Gel image is representative of triplicates. Percent spliced in (PSI) is indicated below each lane.

**A**

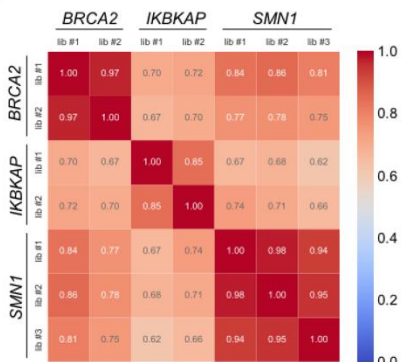

**B**

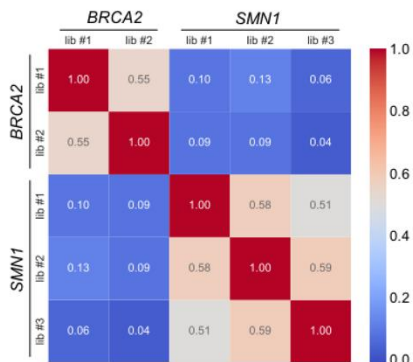

**C**

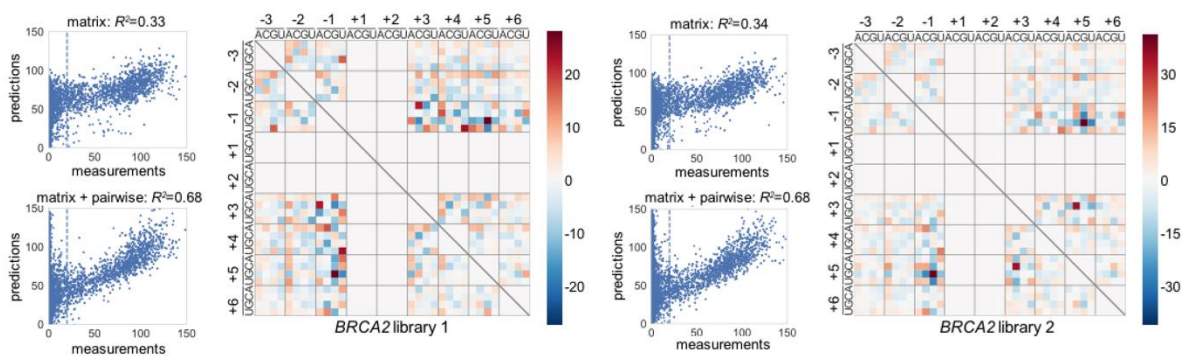

**D**

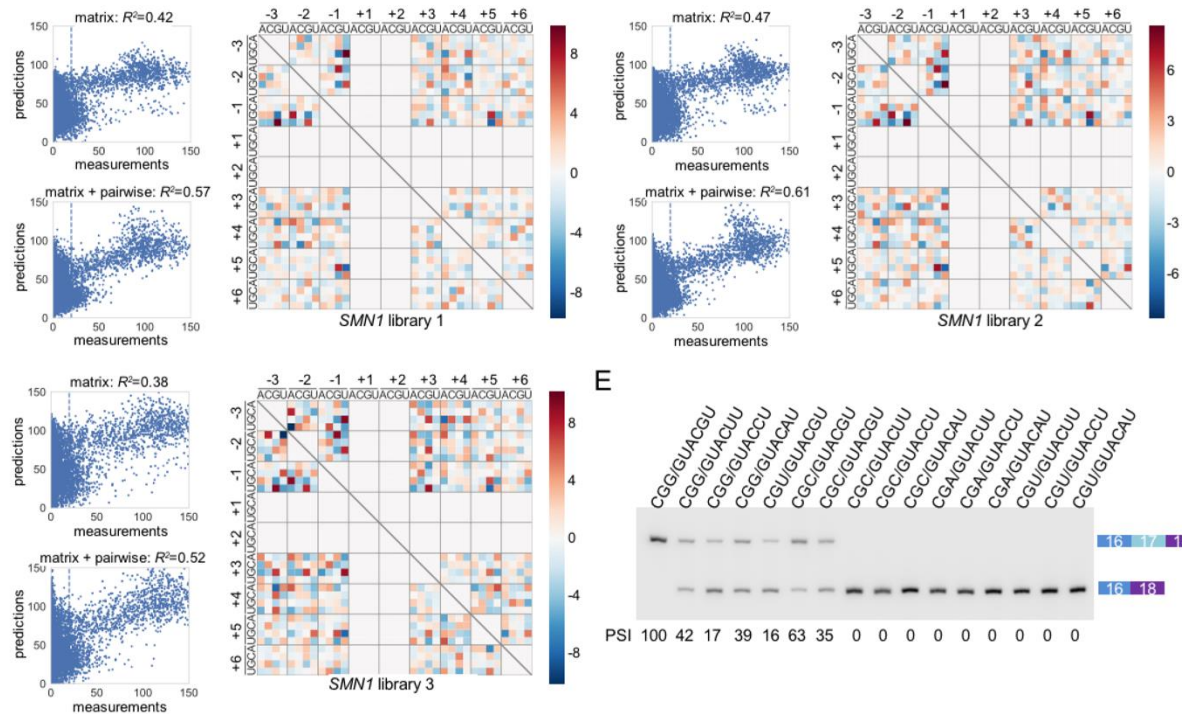

**E**

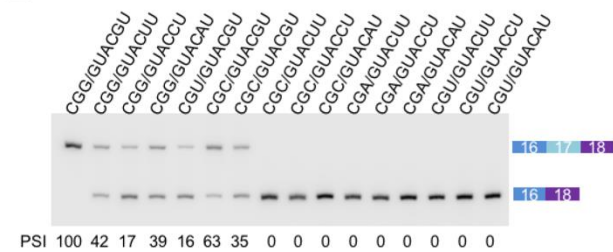

Figure S7. Accounting for pairwise associations between nucleotides improves the predictability of the results. Related to Figure 4.

- (A) Association matrix showing correlations of parameters in the linear matrix model.
- (B) Same as A, but in pairwise associations. The number of active 5'ss was insufficient to analyze pairwise associations for *IKBKAP*.
- (C) Scatter plot showing the predicted PSI versus the measured PSI when considering a linear matrix model only (top) and a matrix model together with pairwise interaction (bottom). The heat map shows pairwise associations between nucleotides at different positions in *BRCA2*, separated by libraries. Red indicates a positive interaction, and blue indicates a negative interaction.
- (D) Same as C, but for *SMN1*.
- (E) Validation of a comprehensive series of mutations at -1 and +5 positions of the 5'ss CGG/GUACGU, in the *BRCA2* context. Gel image is representative of triplicates. Percent spliced in (PSI) is indicated below each lane.

Table S1 - 5'ss sequences that have activity in library results, but do not occur naturally in the human transcriptome. Related to Figure 3E.

| <b><i>BRCA2</i></b> | <b><i>SMN1</i></b> |
|---------------------|--------------------|
| ACGGUAUCG           | ACGGUAUCG          |
| <u>CGCGUACGU</u>    | <u>CGCGUACGU</u>   |
| AAAG <u>CGCUG</u>   | AACGUACGG          |
| CCAGUACCG           | CACGUAC <u>GC</u>  |
| CCCGCC <u>GUG</u>   | CCGGUAUAC          |
| <u>GCGGUA</u> AAC   | <u>CGCGUAC</u> GA  |
| <u>GUGGCAUCG</u>    | GAAGCG <u>GUA</u>  |
|                     | GACGCG <u>GUA</u>  |
|                     | GACGUACGA          |
|                     | <u>GGCGCGUAU</u>   |

Table S2 – Predicted strength of the upstream and downstream 3'ss. Related to Figure 5.

|                    | Gene (input sequence, 5'→3')               | MAXENT | MM    | WMM   |
|--------------------|--------------------------------------------|--------|-------|-------|
| Upstream<br>3'ss   | <i>BRCA2</i><br>(TTCTACTTTTATTTGTTTCAGGGC) | 8.33   | 9.46  | 10.78 |
|                    | <i>SMN1</i><br>(TTCCTTTATTTTCCTTACAGGGT)   | 10.92  | 13.08 | 15.51 |
|                    | <i>IKBKAP</i><br>(ACTGCTTTAATTTATTTAAGATG) | 6.36   | 6.51  | 4.57  |
| Downstream<br>3'ss | <i>BRCA2</i><br>(ATTTTTGTTTTCACTTTTAGATA)  | 11.50  | 12.16 | 12.62 |
|                    | <i>SMN1</i><br>(TTCTAATTTCTCATTTCAGGAA)    | 10.77  | 10.86 | 10.52 |
|                    | <i>IKBKAP</i><br>(CTTTCTCTGTCTTCTCACAGACT) | 11.96  | 12.06 | 13.35 |

Table S3 – Primer sequences. Related to STAR methods.

| Name                | Sequence (5'→3')                                                                                                  |
|---------------------|-------------------------------------------------------------------------------------------------------------------|
| FRT F               | CTGGCTAACTAGAGAACCCACTGC                                                                                          |
| BRCA2 18R           | GCTGTGTCATCCCTTTCCATTATC                                                                                          |
| BRCA2 7R            | GAGCACAGTAGAACTAAGGGTGG                                                                                           |
| SMN1 R              | TAGTGGTGTCAATTTAGTGCTGC                                                                                           |
| IKBKAP R            | GATTGATTCTCAGCTTTCTCATGC                                                                                          |
| BRCA2 Bsu36I ss top | CATCATCCTAAGGAATTTGCTAATAGATGCCTAAGCCCAGAAAGGG<br>TGCTTCTTCAACTAAAATANNGNNTTAAAGCAGCAGGTGGAT<br>GCACATGATGACATAAT |
| BRCA2 NotI bc bot   | TACTACCGCCGCGGNNTTCTAGAATGCA<br>GGTGATTATGTCATCATGTGCATC                                                          |
| BRCA2 PE1 top       | AATGATACGGCGACCACCGAGATCTACACTCTTCCCTACACGACG<br>CTCTCCGATCTNNNNNNNNNT                                            |
| BRCA2 PE1 bot       | CATGTNNNNNNNTCTAGCCTTCTCGCAGCACATCCCTTTCTCA<br>CATCTAGAGCCACCAGCGGCATAGTAA                                        |
| BRCA2 PE2 top       | CGTNNNNNNNAGATCGGAAGAGCGGTTTCAGCAGGAATGCCGA<br>GACCGATCTCGTATGCCGTCTTCTGCTT                                       |
| BRCA2 PE2 bot       | TTCGTCTTCTGCCGTATGCTCTAGCCAGAGCCGTAAGGACGACTTG<br>GCGAGAAGGCTAGANNNNNNNNT                                         |
| BRCA2 insert F      | CATCATCACCTGCAGAGTTAAAGCATTACATTACG                                                                               |
| BRCA2 insert R      | TACTACCACCTGCACACTCTAGAATTACTACTTTAAC                                                                             |
| BRCA2 17F           | AGATGCCTAAGCCCAGAAAG                                                                                              |
| BRCA2 18F           | GGCTCTCCTGATGCCTGTAC                                                                                              |
| BRCA2 18R           | GCTGTGTCATCCCTTTCCATTATC                                                                                          |
| BRCA2 BC R          | GGCAACTAGAAGGCACAGTCG                                                                                             |
| BRCA2 BC-LID F      | CCCTACACGACGCTCTTCCGATCTNNNNNNNNNGGCTCTCCTGAT<br>GCCTGTAC                                                         |
| BRCA2 BC-LID R      | CATTCCTGCTGAACCGCTCTTCCGATCTNNNNNNNNNGGCAACTA<br>GAAGGCACAGTCG                                                    |
| BRCA2 JNCT F        | CCCTACACGACGCTCTTCCGATCTNNNNNNNNNAGATGCCTAAGC<br>CCAGAAAG                                                         |
| BRCA2 JNCT R        | CATTCCTGCTGAACCGCTCTTCCGATCTNNNNNNNNNGCTGTGTC<br>ATCCCTTTCCATTATC                                                 |
| SMN1 BseRI ss top   | CATCATGAGGAGCTTAAATTAANNNGYNNNNCTGCCAGCATGCAGG<br>TGGATGCACATGATGACATAA                                           |
| SMN1 NotI bc bot    | ATGATGGCGGCCGNNNNNNNNNNNTCTAGAATGCA<br>GGTGATTATGTCATCATGTGCATC                                                   |
| SMN1 PE1 top        | AATGATACGGCGACCACCGAGATCTACACTCTTCCCTACACGACG<br>CTCTCCGATCTNNNNNNNNNGTGCT                                        |
| SMN1 PE1 bot        | CNNNNNNNNNAGATCGGAAGAGCGTGTAGGGAAAGAGTGTA<br>GATCTCGGTGGTCGCCGTATCATT                                             |

|                     |                                                                                    |
|---------------------|------------------------------------------------------------------------------------|
| SMN1 PE2 top        | GGCCGCNNNNNNNNNNNAGATCGGAAGAGCGGTTTCAGCAGGAATG<br>CCGAGACCGATCTCGTATGCCGTCTTCTGCTT |
| SMN1 PE2 bot        | AAGCAGAAGACGGCATAACGAGATCGGTCTCGGCATTCTGCTGAA<br>CCGCTCTTCCGATCTNNNNNNNNNNNGC      |
| SMN1 insert F       | CATCATCACCTGCTAGGGCCAGCATTATGAAACTGAATC                                            |
| SMN1 insert R       | ATGATGCACCTGCCCTATCTAGAATAACGCTTCACATTCCAGATC                                      |
| SMN1 7F             | GAAGGAAGGTGCTCACATTC                                                               |
| SMN1 8F             | GACACCACTAAAGAAACGATCAG                                                            |
| SMN1 8R             | CGCTTCACATTCCAGATCTG                                                               |
| SMN1 BC R           | GGCAACTAGAAGGCACAGTCG                                                              |
| SMN1 BC-LID F       | CCCTACACGACGCTCTTCCGATCTNNNNNNNNNNNGACACCACTAAA<br>GAAACGATCAG                     |
| SMN1 BC-LID R       | CATTCTGCTGAACCGCTCTTCCGATCTNNNNNNNNNNNGGCAACTA<br>GAAGGCACAGTCG                    |
| SMN1 JNCT F         | CCCTACACGACGCTCTTCCGATCTNNNNNNNNNNNGAAGGAAGGTG<br>CTCACATTC                        |
| SMN1 JNCT R         | CATTCTGCTGAACCGCTCTTCCGATCTNNNNNNNNNNNCGCTTCAC<br>ATTCCAGATCTG                     |
| IKBKAP BseRl ss top | CATCATGAGGAGAGTGGTTGGANNNGYNNNNNGCCATTGTGCAGGT<br>GGATGCACATGATGACATAAT            |
| IKBKAP XhoI bc bot  | ATGATGCTCGAGNNNNNNNNNNNNNNNNNNNTCTAGAATGCAGG<br>TGATTATGTCATCATGTGCATC             |
| IKBKAP PE1 top      | AATGATACGGCGACCACCGAGATCTACACTCTTTCCCTACACGACG<br>CTCTTCCGATCTNNNNNNNNNNNTTAAT     |
| IKBKAP PE1 bot      | TAANNNNNNNNNNNAGATCGGAAGAGCGTCTGTAGGGAAAGAGTG<br>TAGATCTCGGTGGTCGCCGTATCATT        |
| IKBKAP PE2 top      | TCGAGNNNNNNNNNNNAGATCGGAAGAGCGGTTTCAGCAGGAATG<br>CCGAGACCGATCTCGTATGCCGTCTTCTGCTT  |
| IKBKAP PE2 bot      | AAGCAGAAGACGGCATAACGAGATCGGTCTCGGCATTCTGCTGAA<br>CCGCTCTTCCGATCTNNNNNNNNNNNC       |
| IKBKAP insert F     | CATCGTCACCTGCAAGCGCCATTGTAAGTTTGGCGACTAGTTAGC                                      |
| IKBKAP insert R     | ATGATGCACCTGCCATGTCTAGAATACTTAGGGTTATGATCAT                                        |
| IKBKAP 20F          | GTTGTTTCATCATCGAGCCCTGG                                                            |
| IKBKAP 21F          | GCATGAGAAAGCTGAGAATC                                                               |
| IKBKAP 21R          | GATTCTCAGCTTTCTCATGC                                                               |
| IKBKAP BC R         | GGCAACTAGAAGGCACAGTCG                                                              |
| IKBKAP BC-LID F     | CCCTACACGACGCTCTTCCGATCTNNNNNNNNNGCATGAGAAAGCT<br>GAGAATC                          |
| IKBKAP BC-LID R     | CATTCTGCTGAACCGCTCTTCCGATCTNNNNNNNNNNNGGCAACTA<br>GAAGGCACAGTCG                    |
| IKBKAP JNCT F       | CCCTACACGACGCTCTTCCGATCTNNNNNNNNNNNGTTGTTTCATCAT<br>CGAGCCCTGG                     |
| IKBKAP JNCT R       | CATTCTGCTGAACCGCTCTTCCGATCTNNNNNNNNNNNGATTCTCA<br>GCTTTCTCATGC                     |
| PE1_v4              | AATGATACGGCGACCACCGAGATCTACACTCTTTCCCTACACGACG<br>CTCTTC                           |

|        |                                                        |
|--------|--------------------------------------------------------|
| PE2_v4 | AAGCAGAAGACGGCATACGAGATCGGTCTCGGCATTCCTGCTGAA<br>CCGCT |
| ACTB-F | AGAGCTACGAGCTGCCTGAC                                   |
| ACTB-R | AGCACTGTGTTGGCGTACAG                                   |
